# Supplementary material for: The Phytocyanin Gene Family in Rice (Oryza sativa L.): Genome-Wide Identification, Classification and Transcriptional Analysis
Source: PLoS One. 2011 Oct 3;6(10):e25184. doi: 10.1371/journal.pone.0025184 (PMC3184959; doi:10.1371/journal.pone.0025184)
Supplement: Table S4 — Microarray analysis of rice and Arabidopsis PC genes. (XLS) [file pone.0025184.s007.xls]

## Sheet: TableS3
Table S3. Microarray analysis of OsPC and AtPC genes
		Developmental stages															Abiotic stresses							Developmental stages															Abiotic stresses
Gene	Locus	Root, 7-day-old Seedling	Mature leaf	Y Leaf	SAM	Young inflorescence (P1, upto 3 cm)	Inflorescence (P2, 3-5 cm)	Inflorescence (P3, 5-10 cm)	Inflorescence (P4, 10-15 cm)	Inflorescence (P5, 15-22 cm)	Inflorescence (P6, 22-30 cm)	Seed (S1, 0-2 dap)	Seed (S2, 3-4 dap)	Seed (S3, 5-10 dap)	Seed (S4, 11-20 dap)	Seed (S5, 21-29 dap)	7dSdl	DS	SS	CS		Gene	Locus	R	L	F9	F10/11	F12	F15	Po	S3	S4	S5	S6	S7	S8	S9	S10	CK-S	CK-R	DS-S	DS-R	SS-S	SS-R	CS-S	CS-R
OsENODL1	LOC_Os01g54430	-4.87846	-4.2158	-4.02916	-4.63207	-4.77154	-4.20844	-4.93808	-4.89018	-4.8156	-4.50039	-5.07863	-4.44312	-4.27993	-2.3715	-2.77697	-4.36662	-4.51289	-5.21916	-5.23679		AtENODL1	AT5G53870	-4.45994	-3.64128	-3.48839	-3.18283	-1.59255	-0.641711	-3.87837	-0.359908	0.894815	0.843888	-0.821221	-1.67772	-2.18479	-2.4647	-3.1395	-2.89324	-3.88944	-2.44341	-3.47567	-1.08691	-3.60963	-2.71483	-4.28381
OsENODL2	LOC_Os01g10480	-3.56238	-2.39115	-3.323	-2.44528	-3.5932	-3.18116	-3.1491	-2.9035	-3.47809	-3.11602	-2.29739	-2.07863	-2.77425	-3.04875	-2.2232	-3.81438	-4.24866	-3.39603	-4.96295		AtENODL2	AT4G27520	-0.11795	1.8539	0.768892	1.2055	1.01108	-0.503092	-1.57103	1.42257	1.38636	1.18608	1.58874	2.21683	0.845073	1.583	0.857947	1.79403	-1.34064	2.2779	-0.598637	3.36217	0.620192	2.80398	-0.222016
OsENODL3	LOC_Os01g16610	-3.84098	-3.50715	-4.14383	-2.54026	-4.13334	-3.15263	-4.56004	-4.37561	-3.89904	-3.62225	-3.31112	-4.13682	-3.55536	-3.09042	-2.54142	-4.22208	-4.02032	-4.82767	-4.22208		AtENODL6	AT1G48940	-4.31966	-5.82318	-3.03138	-0.47658	-3.61005	-4.88292	-0.611232	-4.75746	-4.08692	-4.21112	-3.73881	-4.78017	-4.14577	-3.32707	-6.09533	-4.43692	-5.60408	-7.43939	-4.92359	-4.60269	-4.7481	-4.31181	-5.20086
OsENODL4	LOC_Os01g17470	-0.992352	-2.83814	-3.41108	-4.46927	-2.41425	-2.63207	-2.07027	-0.56973	1.33392	-0.230167	-0.603726	-1.69883	-2.24751	-2.76478	-3.4892	-0.273463	-0.843061	-0.542499	-0.209152		AtENODL7	AT1G79800	-5.62749	-5.56044	-1.56646	-1.68822	-2.11952	-4.1139	-0.669851	-4.03239	-4.22086	-3.70141	-3.48666	-3.34044	-2.86505	-3.25963	-2.80431	-4.46683	-4.26947	-3.60131	-4.99622	-3.6243	-4.52856	-3.71558	-4.11056
OsENODL5	LOC_Os01g57880	-0.655646	-4.38803	-4.24939	-3.86104	-3.24751	-2.7797	-1.48031	-0.601013	-0.728462	-3.52076	-4.24186	-4.38388	-3.93504	-5.95646	-8.73936	-1.94533	-1.4982	-1.95563	-2.11631		AtENODL8	AT1G64640	0.122309	-1.76782	-2.09046	-2.03631	-1.57452	-2.85029	-5.25815	-0.485277	-3.17222	-3.04787	-2.70623	-3.17807	-4.67713	-4.83899	-4.52805	-1.00134	-1.28784	-2.20086	-1.51044	-1.55625	-1.96633	-1.34223	-0.614587
OsENODL6	LOC_Os02g06670	-3.78516	-3.82401	-3.58603	-3.47809	-3.8212	-3.42594	-3.30719	-2.92144	-2.88724	-4.24562	-3.86104	-4.68216	-3.73407	-4.21949	-4.42168	-4.06424	-3.33939	-3.11496	-4.52728		AtENODL9	AT3G20570	1.08283	-0.578893	-1.29235	-1.19316	-1.41902	-1.13475	-1.43037	0.226492	-2.33141	-2.73552	-2.611	-2.91025	-2.48234	-2.00205	-1.86292	-0.265015	0.0630709	-0.089756	0.420035	-0.0269828	0.313801	-0.468952	0.702434
OsENODL7	LOC_Os02g06690	-1.22784	-4.12986	-4.37974	-3.92596	-0.874081	-0.491991	0.125555	0.593927	-1.56708	-1.29739	-1.84098	-2.52304	0.104284	3.05866	2.08597	-2.34416	-1.67717	-1.74546	-2.17742		AtENODL10	AT5G57920	-2.07192	-2.7139	-3.28316	-3.25315	-2.61893	-2.96918	-3.57507	-2.23096	2.33625	2.45611	2.18798	1.11812	-0.501519	-0.782872	-1.07608	-2.96477	-1.31463	-2.68304	-1.10921	-1.91755	-1.56347	-2.58278	-1.21956
OsENODL8	LOC_Os02g48820	-3.31507	-1.28282	-2.71569	-1.3062	0.693059	-0.402919	-0.64536	-1.08746	-1.92747	-2.02916	0.162039	1.60422	0.669282	-0.820847	-1.65127	-2.79575	-2.78598	-2.71014	-3.34894		AtENODL11	AT2G23990	-4.84962	-6.41515	-4.36407	-5.38133	-5.05273	-3.62672	-3.77467	-1.35457	-2.68089	-5.21741	-5.26052	-4.42904	-4.041	-4.8337	-4.11017	-4.78844	-4.12738	-4.98356	-4.48201	-5.45929	-3.67793	-4.67067	-4.34151
OsENODL9	LOC_Os02g49350	-4.81001	-4.17577	-3.84954	-4.27223	-4.73407	-3.95338	-4.54142	-3.92898	-4.28379	4.15761	-4.66192	-4.01625	-5.41743	-4.03566	-5.07863	-5.08006	-4.9777	-4.6637	-4.72873		AtENODL12	AT4G30590	-3.03239	-3.52627	-3.51248	-3.32243	-2.03467	-2.95668	-1.67457	-2.75517	-0.49594	-0.693752	-1.03663	-1.54119	-2.76269	-2.38955	-2.78229	-2.44156	-2.95547	-2.64587	-2.80346	-2.1811	-3.20138	-2.6703	-3.16365
OsENODL10	LOC_Os03g02400	-0.0694327	-4.08873	-4.02269	-1.38647	-1.60826	-2.59201	-1.98919	-1.47754	-1.64505	-2.87846	-3.71048	-3.10572	-2.30326	-3.5932	-2.9035	-1.26439	-2.00828	-1.68875	-1.30721		AtENODL13	AT5G25090	-0.431283	-0.682371	0.600173	-0.12053	-0.469814	-1.78952	-2.33576	-0.771927	-0.42307	-0.706935	-1.09909	-2.06274	-2.70402	-2.36582	-2.48856	-0.826298	-1.06531	-0.729766	-1.46761	-0.731183	-1.86725	-1.67793	-0.707005
OsENODL11	LOC_Os03g44630	-3.16683	-3.12986	-3.14207	-2.93656	-2.87408	-2.83672	-3.17398	-3.7934	-3.38388	-2.23905	-2.76613	-3.00505	-3.56943	-2.47147	-2.25792	-3.7539	-3.98513	-3.96785	-3.85918		AtENODL14	AT2G25060	0.479667	0.833781	1.42289	0.846464	0.34754	-0.697199	-2.43237	-0.134075	1.80681	1.62228	1.57284	0.867785	-1.75944	-1.87599	-3.91188	0.616558	0.595349	0.405237	0.439938	0.81515	-1.10921	0.621821	0.541333
OsENODL12	LOC_Os03g55120	0.472671	-1.69368	-2.63084	1.99873	2.21055	1.96016	1.62927	1.91232	1.35441	-0.266012	-0.473952	-0.165045	-0.0307831	-0.588418	-2.23624	-0.390679	-1.45028	-1.37067	-0.257443		AtENODL15	AT4G31840	1.39969	1.06336	2.61522	2.15552	1.63817	0.153235	-0.94309	1.45471	2.78094	2.07774	1.89109	0.605819	-1.65365	-2.78824	-2.18605	0.337423	0.694365	0.433081	0.295363	0.200356	0.136431	-0.278279	1.20147
OsENODL14	LOC_Os04g57750	-3.12292	-2.76613	-2.46269	-3.0686	-2.68855	-3.00984	-3.16683	-3.54605	-2.77697	1.67122	-2.02189	-2.7729	-3.21764	-2.91244	-2.29739	-4.20463	-2.29485	-2.94111	-4.04082		AtENODL16	AT3G01070	-1.2089	-3.75538	-3.73757	-3.47152	-3.12759	-3.79508	-1.42655	-3.09903	-1.1557	-1.28466	-1.34208	-2.08797	-2.23924	-2.01858	-2.05606	-3.21242	-1.62623	-3.57597	-1.86684	-2.96255	-2.16263	-3.14591	-1.55374
OsENODL15	LOC_Os05g49580	-3.61737	-4.09211	-3.32897	-3.44961	-4.58365	-3.57652	-4.44312	-4.22691	-4.21949	-4.45178	-4.58842	-5.1902	-4.37974	-3.4892	-3.03729	-4.77951	-4.17034	-4.28183	-4.64005		AtENODL17	AT5G15350	3.07871	2.00259	1.69278	1.55635	1.68073	0.497454	-2.27866	1.97475	0.989835	1.37524	0.874498	0.19018	-1.09876	-2.78505	-3.01933	2.14154	2.12337	1.55523	1.63932	0.239219	1.41522	3.01631	2.72427
OsENODL16	LOC_Os06g17730	-3.46707	-3.89313	-3.672	-4.5322	-4.50489	-4.03892	-4.31507	-4.10231	-4.2684	1.15492	-4.89018	-4.1544	-5.35109	-3.6125	-3.30522	-4.73289	-4.40597	-4.85011	-4.50931		AtENODL18	AT1G08500	0.230047	-3.27538	-3.27896	-2.99207	-3.01908	-3.13624	-2.65248	-5.35205	-3.79379	-3.96003	-2.60855	-0.932983	-1.7508	-1.13306	-1.56591	-3.28825	-1.30799	-2.96655	-1.29746	-0.841723	-0.0110617	-3.52069	-1.01462
OsENODL17	LOC_Os06g36010	-4.48697	-4.11602	-4.11946	-3.41108	-3.32698	-3.76613	-3.2896	-4.86104	-4.5789	3.01989	-3.99077	-2.44636	-4.52304	-3.61493	-4.17577	-5.13962	-3.46708	-5.00765	-5.78382		AtENODL19	AT4G12880	1.69707	0.383386	-0.126613	-0.1376	0.0821329	-0.344237	-5.10273	1.21551	-0.325406	-1.08142	-1.49672	-1.46904	-2.12006	-2.41137	-1.7509	0.866606	1.0392	0.543054	0.78903	0.827137	0.375793	0.633428	1.33042
OsENODL18	LOC_Os06g46740	-3.28573	1.17415	-1.3013	-3.7027	-2.88431	-2.81141	-2.90945	-2.18477	-3.87554	0.42318	2.06913	2.46737	2.28227	2.95451	2.60376	-2.28183	4.11302	3.53639	-1.41013		AtENODL22	AT1G17800	-4.71714	-4.26822	-4.51248	-4.79551	-4.2558	-4.17278	-2.5245	-1.44247	-4.42175	-4.2464	-3.82581	-3.90124	-3.23386	-3.01359	-3.00861	-3.41005	-3.6257	-3.95856	-3.35309	-3.23476	-3.37714	-3.37478	-3.36595
OsENODL19	LOC_Os07g02200	2.25304	-1.26984	0.240612	0.802078	-0.272953	0.531416	0.985555	1.67775	2.4074	-1.09975	-0.980941	-0.521331	-0.1329	-1.62654	-5.13334	0.212261	-1.98141	-0.978625	0.0750555		AtPC1	AT2G02850	-0.244275	-0.745257	0.340833	1.10772	1.95536	3.05177	-3.45012	0.814282	-2.82515	-2.09046	-0.734695	0.539682	3.62394	3.96985	4.11878	-4.00717	0.764642	-3.79159	0.700509	-3.93399	-0.104921	-3.30785	1.0286
OsENODL20	LOC_Os08g17160	-3.94418	-3.83814	-3.6569	-3.74201	-4.23437	-3.88431	-4.11602	-3.95646	-3.96884	-4.06195	-4.1544	-3.87846	-4.33097	-3.7934	-4.98762	-4.1619	-4.49864	-4.6637	-4.42606		AtUC1	AT2G32300	-0.390314	-5.32955	-4.22259	-4.40466	-5.16224	-5.34576	-4.2617	-4.13056	-4.6382	-4.97112	-3.97257	-3.99355	-5.53019	-4.04049	-3.65948	-4.5325	-0.609106	-4.697	-0.480503	-4.61939	-0.570719	-4.98536	-0.346202
OsENODL21	LOC_Os09g38540	-0.273914	-4.29155	-4.03241	3.05916	0.942499	1.33273	-0.0754879	-0.96496	-1.03078	-3.09211	-2.45832	-3.46707	-1.88358	-2.45614	-2.08199	0.602934	0.182173	-0.120399	0.608087		AtUC2	AT2G44790	3.72511	-2.5681	-0.442265	-2.92541	-2.65715	-0.0753658	-2.18521	-2.32846	-1.19133	-1.18851	-0.933101	-1.79358	-3.11818	-3.1425	-2.83392	-2.26782	3.47524	-2.45804	3.54633	-2.13511	4.01818	-2.41277	3.8253
OsENODL22	LOC_Os11g29910	-3.52761	-4.40476	-3.73936	-3.93504	-4.3633	-3.83814	-4.49143	-3.7879	-3.49815	-3.91693	-3.5789	-4.05864	-3.3633	-4.39637	-4.95646	-5.11767	-4.18168	-4.21624	-4.18168		AtUC3	AT3G60280	-4.07024	-4.14141	-2.07348	-4.15179	-4.97015	-4.00094	-2.64032	-3.32367	-4.50196	-4.51742	-3.27807	-3.82931	-3.98229	-4.23764	-3.9334	-3.55508	-4.75731	-3.08619	-4.26947	-3.24876	-4.14843	-4.30955	-3.81945
OsENODL23	LOC_Os12g05470	-2.70658	-3.03566	-3.27608	-2.8003	-3.30326	-2.91993	-2.87263	-3.598	-3.82401	-3.40897	-3.932	-3.44744	-2.33497	-1.83743	-0.286937	-3.32203	-3.49864	-4.31265	-3.63809		AtUC4	AT1G22480	-4.80152	-5.95094	-3.4929	-4.56482	-6.12087	-6.09533	-5.18339	-2.37108	2.5288	2.18708	-6.18227	-5.86572	-5.27717	-6.15783	-6.1425	-4.05747	-4.19668	-4.16263	-3.67212	-5.17801	-3.8454	-4.52331	-3.33747
OsENODL24	LOC_Os12g26880	0.412477	-4.35109	-4.24562	-3.04219	-3.69754	-3.5368	-2.95492	-2.32101	-0.285242	-2.30915	-3.64691	-3.66695	-3.1902	-2.36842	-3.42808	-1.44088	-2.11224	-1.59388	-1.03534		AtUC5	AT1G72230	0.378719	-3.0329	1.30035	-0.253072	-0.536306	-1.2372	-5.87294	1.53298	0.273163	-0.0746509	1.05177	0.910458	0.114265	-0.601885	-1.05375	-2.36742	0.00502612	-2.2193	-0.369401	-1.62658	-0.801577	-1.755	0.427251
OsUCL1	LOC_Os01g57690	-0.721242	-3.82964	-3.18477	-3.08704	-2.28573	-2.64691	-1.80654	-0.983687	-1.63947	-3.05368	-3.6594	-4.64691	-2.98919	-3.44312	-4.3633	-2.26892	-1.7849	-1.89489	-2.37555		AtUC6	AT3G27200	0.799487	-0.880244	-0.77546	0.934126	1.52511	-0.805824	-4.62064	0.96369	0.950118	1.39357	3.03497	2.8553	2.94569	1.9256	2.60812	-1.24646	-0.410957	-1.28049	-0.388054	-0.87287	-0.636014	-0.614325	0.506171
OsUCL2	LOC_Os02g15710	-4.932	-4.35922	-3.83247	-4.54605	-4.80445	-4.5789	-4.97507	-4.7879	-4.27993	-5.00664	-5.31903	-1.57061	-4.77697	-6.33497	-7.01947	-5.81879	-5.02797	-4.65182	-5.52367		AtUC7	AT3G60270	-4.15728	-6.32089	-5.24757	-7.25109	-4.14195	-4.52379	-3.23241	-4.83194	-5.84962	-6.79208	-4.32831	-4.79379	-3.20428	-3.89572	-5.91141	-6.43446	-2.29886	-5.13137	-2.60997	-5.98897	-3.69848	-5.56852	-3.47061
OsUCL3	LOC_Os02g15730	-4.05204	-4.10915	-3.77425	-3.637	-4.70788	-4.06527	-4.60282	-4.90201	-3.28573	-3.932	-4.35515	-3.28766	-4.95031	-6.36739	-5.5507	-5.1563	-4.85918	-4.9532	-4.83661		AtSC1	AT2G26720	-8.94333	-8.70583	-9.15563	-9.46879	-8.693	-8.5245	-7.76499	-9.10379	-9.40466	-9.70583	-9.00539	-8.07855	-8.00539	-7.76499	-6.63974	-8.36243	-8.52069	-8.04426	-8.43939	-7.12142	-8.32544	-7.87433	-8.36243
OsUCL4	LOC_Os02g43660	4.41696	-2.88871	-2.74867	-3.27993	-2.38181	-3.05204	-2.22598	-0.373038	2.21141	-0.745006	-2.31804	-3.45614	-1.20844	-0.702378	-4.6924	1.73622	1.09904	0.847718	1.78576		AtSC2	AT2G31050	-3.18031	-2.89022	-2.90262	-2.85564	-3.26348	-2.87452	-0.835573	-2.68227	-3.3442	-3.15728	-3.20371	-2.85698	-2.51195	-2.24128	-2.23444	-2.36185	-2.89578	-2.67539	-3.05557	-2.13661	-2.66922	-2.5719	-2.55441
OsUCL5	LOC_Os02g49850	-1.45505	-2.91244	-2.05864	-0.990772	-1.65878	-1.60101	-1.24704	-0.895347	-1.1329	-1.86393	-2.29252	-2.93352	-1.94571	-0.692076	-0.540843	-1.53817	-2.2765	-1.98575	-1.73394		AtSC3	AT5G20230	-0.525031	0.30145	-3.02083	-1.27314	2.3431	2.70771	5.64415	1.34522	-1.43386	-0.94149	-2.80518	-2.39505	-0.545867	0.574508	0.329683	-0.516615	-0.148996	-1.85732	0.687523	-1.84827	3.8059	3.98696	0.600878
OsUCL6	LOC_Os02g52180	1.00082	-1.55361	-4.00664	-4.02269	-3.07027	-3.70529	-2.8003	-1.38699	0.833507	-0.523898	-0.61676	-1.74334	-1.95954	-3.76343	-3.5368	-0.274791	-0.310514	-1.13101	-1.83829		AtSC4	AT5G26330	-1.5309	-3.08928	-3.45587	-3.34263	-3.46811	-3.51283	-3.19408	-2.18985	-4.0594	-5.06197	-5.07543	-5.516	-4.91886	-4.73264	-4.77594	-1.84622	-2.00191	-1.92143	-2.31917	-2.36683	-3.11253	-2.00556	-1.80108
OsUCL7	LOC_Os03g15340	2.97506	-3.95954	-3.62715	-4.08536	-3.56708	-3.24562	-0.721896	0.162749	2.4133	1.47774	-3.26649	-0.0526534	0.958732	-1.06693	-2.97977	-0.641758	-1.67467	-1.3642	-0.889364		At4g01380	AT4G01380	-3.92213	-3.79808	-4.00094	-3.68703	-3.5521	-3.73059	-2.84607	-3.72814	-3.77425	-3.94048	-3.73511	-2.95213	-2.87769	-2.89457	-2.12288	-3.4618	-3.2493	-4.2629	-3.37537	-3.34266	-3.84786	-4.16569	-3.19199
OsUCL8	LOC_Os03g50140	-3.52076	-4.04219	-4.15087	2.42924	1.59452	2.0966	0.290496	-0.604028	-1.38803	-1.94647	-1.66443	-2.81699	-2.96419	-3.8212	-4.598	-0.788957	-2.18168	-1.53771	-1.14758		R, 17-day-old roots; L, 21-day-old rosette leaves; F9, flowers stage 9; F10/11, flower stage 10/11; F12, flower stage 12, F15, flower stage 15; Po, mature pollen; S3, siliques of seeds stage 3; S4, siliques of seeds stage 4; S5, siliques of seeds stage 5; S6, seeds stage 6; S7, seeds stage 7; S8, seeds stage 8; S9, seeds stage 9; S10, seeds stage 10.
OsUCL9	LOC_Os03g50160	1.27966	0.64536	-0.551571	-0.959158	0.585085	-0.450697	1.38019	2.07348	2.93132	2.67514	1.43388	-0.728133	-0.681527	-1.38959	-0.40581	1.6052	2.17521	2.40651	1.27081		CKS and CKR, control shoots and roots; DSS and DSR, drought stressed shoots and roots; SSS and SSR, salt stressed shoots and roots; CSS and CSR, cold stressed shoots and roots.
OsUCL10	LOC_Os03g57730	-4.81001	-4.42594	-4.14734	-4.7879	-4.83247	-4.637	-5.01947	-5.27993	-5.20477	-5.20477	-5.4605	-5.38388	-5.33497	-5.66695	-7.07194	-5.71631	-4.54914	-5.17884	-5.0434
OsUCL11	LOC_Os03g57740	-3.07361	-4.02916	-3.6544	-3.05039	-3.02269	-3.60524	-3.82401	-3.86393	-3.80168	-3.49591	-4.48697	-3.6494	-3.50941	-4.76613	-7.04546	-3.86832	-4.10143	-3.9387	-3.62643
OsUCL12	LOC_Os03g63390	1.82837	-1.49815	-1.80793	-3.40686	-2.67708	-3.30915	-2.55186	-1.04464	1.2443	-0.775274	-0.349823	-2.8198	-1.66254	-3.95646	-4.16861	1.11491	1.87815	2.22998	0.504571
OsUCL14	LOC_Os04g46120	-0.349823	-3.49143	-3.56708	-4.41743	-4.37561	-4.42594	-3.50489	-2.7879	-1.89461	-3.14207	-5.1902	-5.27993	-3.16326	-1.97118	-3.20477	-3.176	-3.15211	-2.90308	-3.79466
OsUCL15	LOC_Os04g46130	0.350441	-3.61493	-3.11086	-2.98762	-3.77154	-4.15087	-3.10572	-1.32698	0.614436	-2.90945	-4.01625	-3.37355	-2.75804	-2.0862	-3.5789	1.64966	1.12516	1.33525	1.78704
OsUCL16	LOC_Os06g11490	2.79803	-2.60644	-2.69368	-1.33999	-1.8135	-0.662859	0.841619	2.12433	4.29445	3.07997	1.86055	0.325462	0.35262	-0.31063	-1.81141	2.53554	1.29364	1.94463	2.42587
OsUCL17	LOC_Os06g15600	0.385522	-4.03892	-3.79616	-3.4605	-3.73407	-4.08873	-3.50715	-4.29544	-4.47368	-2.68089	-3.16504	-4.8156	-4.37561	-3.598	-3.7879	-1.446	-2.38698	-3.10413	-2.46448
OsUCL18	LOC_Os06g50420	-0.175771	-3.6924	-3.66192	-3.75536	-4.40476	-3.42381	-4.00027	-3.94113	-3.80445	-3.85241	-3.22691	-4.26458	-3.2896	-1.36637	-0.839203	-1.4362	-2.24941	-2.72458	-1.14689
OsUCL20	LOC_Os07g01440	3.70183	-3.33297	-3.24751	-3.31903	-3.86393	-3.05698	-2.99552	-3.6544	-4.05864	-3.08704	-4.96264	-3.6247	-3.43236	-3.19201	-3.06361	-0.214054	-1.15002	-1.33187	-0.664443
OsUCL21	LOC_Os07g07170	-4.07194	-4.27993	-4.2684	-4.15794	-3.92596	-3.63207	-3.54605	-4.38803	-3.87554	-4.18658	-4.13682	-3.95646	-4.14032	-6.7183	-7.6569	-4.39274	-4.57133	-4.23679	-4.29408
OsUCL22	LOC_Os07g35860	-0.26458	-4.34301	-4.2158	-4.598	-4.86104	-4.58365	-5.05864	-5.27993	-5.03241	-5.21211	-5.33497	-5.35922	-5.39219	-6.41743	-8.50489	-5.63614	-4.02286	-5.09071	-4.65577
OsUCL23	LOC_Os08g04310	-0.759725	-2.7729	-2.7567	-4.01304	-2.44312	-3.91393	-1.93732	-0.694644	1.92404	-0.894977	-1.67771	-2.49815	-2.07863	-1.59021	-3.1704	0.705825	-0.364401	-0.576001	0.392212
OsUCL24	LOC_Os08g04340	-1.39376	2.5871	3.49481	-3.77697	3.16273	2.24049	3.22975	3.11512	-4.06195	2.99612	3.13178	1.15135	1.27096	1.14786	-0.779699	-1.02701	2.01936	1.39924	-0.677424
OsUCL26	LOC_Os08g04360	-2.56238	-2.29058	-1.43773	-2.54954	-1.21995	-1.26697	0.329576	0.312729	-3.6494	1.23244	-0.812802	-2.98762	-2.22227	-3.52076	-3.95338	-2.31734	-1.07642	-0.193646	-2.44899
OsUCL27	LOC_Os08g04370	-1.69047	-2.27223	-2.78653	-2.69111	-0.790649	-0.570614	1.12937	0.857816	-2.54258	1.91759	-1.00624	-1.89166	-1.91094	-2.36534	-2.00984	-2.73185	-1.18061	-0.387188	-2.44642
OsUCL29	LOC_Os08g37660	-1.90796	3.99547	3.99638	-2.8596	3.51761	2.68786	4.02268	4.09553	-1.77358	4.41141	3.75808	2.32807	1.06411	0.343572	-1.2969	1.04063	2.86027	2.3005	2.58882
OsUCL30	LOC_Os08g37670	3.29665	4.4211	0.79603	-2.1491	3.5601	1.45003	4.25499	4.27182	2.55479	4.31237	4.46436	2.48836	3.49971	2.88909	2.26631	2.71615	3.8674	3.32399	3.46836
OsUCL31	LOC_Os09g29390	-2.48142	-1.67137	-1.37664	-3.76343	-3.05204	-3.34704	-3.16683	-1.97898	1.45518	1.37599	0.260143	0.0311583	-0.360236	-0.65065	-3.09211	-0.466217	-0.863742	-0.91338	-1.13893
OsUCL32	LOC_Os09g36940	-2.31606	-4.03892	-4.14383	-4.49143	-3.94113	-4.323	-3.98447	-3.56943	-4.35922	-3.55303	-4.29155	-4.01947	-4.82682	-3.80723	-4.66192	-3.80777	-3.79466	-4.14516	-3.95078
OsUCL33	LOC_Os09g39940	-2.23343	0.154566	-3.04219	-4.56473	-2.50152	-4.18297	-2.2158	-3.12812	-4.7183	0.770997	0.593664	0.0419998	0.07988	0.527564	1.11578	-1.74126	0.147202	0.400314	-1.17742
OsUCL35	LOC_Os11g24140	-4.00346	-4.26077	-2.97351	-4.11258	-4.33097	-4.50039	-4.62225	-4.98133	-5.04546	-5.04546	-4.98762	-4.35922	-3.81001	-5.64691	-7.24186	-4.01018	-4.85464	-3.86374	-4.38945
OsSCL1	LOC_Os03g59280	-0.530767	-4.12292	-2.8226	-2.33999	-2.06693	-2.79616	-2.02673	-0.776974	0.75626	-2.7934	-2.73539	-2.48253	-1.83388	-1.13552	-1.64257	-1.60433	-1.1563	-2.42269	-1.30489
OsSCL2	LOC_Os04g53710	0.398083	-4.44744	-4.20111	-4.75536	-4.48253	-4.40476	-4.64195	-5.27993	-5.24186	-4.58365	-5.23437	-4.6924	-4.61737	-5.86104	-3.672	-3.53635	-3.43451	-5.07477	-3.44472
OsSCL3	LOC_Os06g11310	2.27814	-1.90945	-2.6544	-2.27415	-2.17577	-1.85026	-0.936178	-0.145584	0.797859	-0.956843	-0.139447	-2.16861	-1.73077	-0.929355	-1.50546	0.955224	0.721696	0.900079	0.356529
YR, roots of 7-day-old seedlings; ML, mature leaves, YL, leaves of 7-day-old seedlings; SAM, up to 0.5 mm, shoot apical meristem; P1, 0-3 cm panicles; P2, 3-5 cm panicles; P3, 5-10 cm panicles; P4, 10-15 cm panicles;P5, 15-22 cm panicles; P6, 22-30 cm panicles; S1, 0-2 DAP seeds;S2, 3-4 DAP seeds; S3, 5-10 DAP seeds; S4, 11-20 DAP seeds;S5, 21-29 DAP seeds.
CK, control; DS, drought stress; SS, salt stress; CS, cold stress.
